# Supplementary material for: The activity of HYDROPEROXIDE LYASE 1 regulates accumulation of galactolipids containing 12-oxo-phytodienoic acid in Arabidopsis
Source: PubMed Central journal article supplement (PMC5014160; doi:10.1093/jxb/erw278), 2016-07-15
Supplement: supp_erw278_supplementary_figures_S1_S2_Tables_S1_S3.pdf [file supp_erw278_supplementary_figures_S1_S2_Tables_S1_S3.pdf]

# SUPPLEMENTARY MATERIAL

The activity of Hydroperoxide lyase 1 regulates accumulation of galactolipids containing 12-oxo-phytodienoic acid in *Arabidopsis thaliana*. Anders K Nilsson, Per Fahlberg, Oskar N Johansson, Mats Hamberg, Mats X Andersson and Mats Ellerström

Co1-0 ATGTTGTTGAGAACGATGGCGGCGACTTCCCCGCGGCCACCACCGTCAACATCCCTAACATCTCAGCAGCCACCATCACCCCTCACAGCTTCCCCTCCGTACAATGCCGGGATCGTAC  
C24 ATGTTGTTGAGAACGATGGCGGCGACTTCCCCGCGGCCACCACCGTCAACATCCCTAACATCTCAGCAGCCACCATCACCCCTCACAGCTTCCCCTCCGTACAATGCCGGGATCGTAC  
\*\*\*\*\*

Co1-0 GGCTGGCCGTTGGTTGGACCATTATCGGACCGTTTAGA-----TTCCAAGGACCCGATAAGTTTTCCGGACAAGAGCTGAGAAGTATAAGAGCACTGTGTTCCGTACAAATATT  
C24 GGCTGGCCGTTGGTTGGACCATTATCGGACCGTTTAGATTACTTCTGGTTCCAAGGACCCGATAAGTTTTCCGGACAAGAGCTGAGAAGTATAAGAGCACTGTGTTCCGTACAAATATT  
\*\*\*\*\*

Co1-0 CCTCCGACGTTTCTTTCTTCGGCAACGTTAACCCCTAACATCGTCGCGGTTCTTGACGTCAGTCTTTTAGCCATCTTTTGGACATGGATCTAGTTGATAAAAAGAGATGTTCTCATCGGA  
C24 CCTCCGACGTTTCTTTCTTCGGCAACGTTAACCCCTAACATCGTCGCGGTTCTTGACGTCAGTCTTTTAGCCATCTTTTGGACATGGATCTAGTTGATAAAAAGAGATGTTCTCATCGGA  
\*\*\*\*\*

Co1-0 GACTTCCGGCCTAGCCTTGGGTTCTACGGCGGCGTTCGTGTTGGAGTTTATCTCGACACTACTGAGCCAAAGCAGCCAAAGATAAAAAGTTTCGCTATGGAAACACTAAAACGAAGCTCA  
C24 GACTTCCGGCCTAGCCTTGGGTTCTACGGCGGCGTTCGTGTTGGAGTTTATCTCGACACTACTGAGCCAAAGCAGCCAAAGATAAAAAGTTTCGCTATGGAAACACTAAAACGAAGCTCA  
\*\*\*\*\*

Co1-0 AAAGTATGGCTACAAGAGCTTCGTTCAAACCTAAACATTTTCTGGGGAACAATCGAATCCGAAATCTCCAAAACGGTGCCGCTTCATATATCTCCCTCTCCAACGTTGCATCTTCAGT  
C24 AAAGTATGGCTACAAGAGCTTCGTTCAAACCTAAACATTTTCTGGGGAACAATCGAATCCGAAATCTCCAAAACGGTGCCGCTTCATATATCTCCCTCTCCAACGTTGCATCTTCAGT  
\*\*\*\*\*

Co1-0 TTCCTCTGCGCCTCTCTCGCCGGCGTTGACGCTTCCGTATCGCCGGACATCGCTGAGAACGGTTGAAAACAATCAATACTTGGCTTGCCTTGAAGTTATCCCACTGCTAAACTTGGC  
C24 TTCCTCTGCGCCTCTCTCGCCGGCGTTGACGCTTCCGTATCGCCGGACATCGCTGAGAACGGTTGAAAACAATCAATACTTGGCTTGCCTTGAAGTTATCCCACTGCTAAACTTGGC  
\*\*\*\*\*

Co1-0 GTAGTTCCCTCAGCCTCTTGAAGAGATTTTACTTCATACTTGGCCTTATCCTTCTCTTAAATCGCCGAAATACAAAAGCTTTACAATTTTCATCGACGAGAACCGGAGATTGTCTC  
C24 GTAGTTCCCTCAGCCTCTTGAAGAGATTTTACTTCATACTTGGCCTTATCCTTCTCTTAAATCGCCGAAATACAAAAGCTTTACAATTTTCATCGACGAGAACCGGAGATTGTCTC  
\*\*\*\*\*

Co1-0 CGGTTAGGTCAAGAAGAATTTCGGGTTGACCCGAGATGAGGCTATTCAAATCTTCTTTGTTTTAGGTTTTAATGCCTACGGGGCTTTCCGTCTTCTTACCTTCTTTGATCGGGAGA  
C24 CGGTTAGGTCAAGAAGAATTTCGGGTTGACCCGAGATGAGGCTATTCAAATCTTCTTTGTTTTAGGTTTTAATGCCTACGGGGCTTTCCGTCTTCTTACCTTCTTTGATCGGGAGA  
\*\*\*\*\*

Co1-0 ATAACCGCGGACAATTCGGGTTTACAGGAGAGATTAGAACCGAAGTCAGGAGAGTTGCGGATCCGGGTCGGATCTTAATTTCAAGACGGTTAACGAAATGGAGCTGGTTAAATCCGTG  
C24 ATAACCGCGGACAATTCGGGTTTACAGGAGAGATTAGAACCGAAGTCAGGAGAGTTGCGGATCCGGGTCGGATCTTAATTTCAAGACGGTTAACGAAATGGAGCTGGTTAAATCCGTG  
\*\*\*\*\*

Co1-0 GTTTACGAAACGCTGCGTTTTAGTCTCCGGTTCCGCTGCAATTCGCACGTGCGAGGAAAGATTTTTCAGATAAGTTACACGATGCTGTTTTTGGAGTCAAGAAAGGTGAGCTTCTTTGT  
C24 GTTTACGAAACGCTGCGTTTTAGTCTCCGGTTCCGCTGCAATTCGCACGTGCGAGGAAAGATTTTTCAGATAAGTTACACGATGCTGTTTTTGGAGTCAAGAAAGGTGAGCTTCTTTGT

```

*****
Col-0  GGTATCAGCCGCTTGTGATGAGAGACGCTAATGTTTTTGACGAACCGGAGGAATTTAAACCGGACCGGTATGTAGGTGAGACCGGGTCTGAATTGCTGAATTATCTCTACTGGTCTAAC
C24    GGTATCAGCCGCTTGTGATGAGAGACGCTAATGTTTTTGACGAACCGGAGGAATTTAAACCGGACCGGTATGTAGGTGAGACCGGGTCTGAATTGCTGAATTATCTCTACTGGTCTAAC
*****

Col-0  GGTCCACAAACCGGTACCCCGAGCGCGTCGAACAAACAGTGTGCAGCTAAGGACATTGTCACTCTCACGGCTTCCTTGCTCGTTGCCGATTTATTTCTCCGGTATGATACGATTACTGGT
C24    GGTCCACAAACCGGTACCCCGAGCGCGTCGAACAAACAGTGTGCAGCTAAGGACATTGTCACTCTCACGGCTTCCTTGCTCGTTGCCGATTTATTTCTCCGGTATGATACGATTACTGGT
*****

Col-0  GACTCCGGTTCAATTAAAGCTGTTGTTAAAGCTAAA TAA
C24    GACTCCGGTTCAATTAAAGCTGTTGTTAAAGCTAAA TAA
*****

```

**Fig. S1.** Alignment of the coding sequences of Col-0 and C24 *HPL1* alleles. Highlighted in green is the transcriptional start codon suggested by Duan, Huang et al. (2005), red stop codon, dashed line indicates the 10 bp deletion found in Col-0. Col-0 genetic sequence was downloaded from TAIR ([www.arabidopsis.org](http://www.arabidopsis.org)) and C24 sequence was determined by sequencing cDNA. Alignment was made using Clustal Omega (<http://www.ebi.ac.uk/Tools/msa/clustalo/>).

A

| GOT35     |            |                                                                                         |                                                  |      |     |      |                          |  |
|-----------|------------|-----------------------------------------------------------------------------------------|--------------------------------------------------|------|-----|------|--------------------------|--|
| TAIR ID   | Gene       | Description                                                                             | Localization                                     | SNPs | NSS | NSSP | T-DNA line               |  |
| AT4G15396 | CYP702A6   | A member of the cytochrome P450 family                                                  | Secreted <sup>1</sup> /Membrane <sup>2</sup>     | 22   | 7   | 3    | SALK_202538C             |  |
| AT4G15400 | ABS1, BIA1 | Encodes BIA1, a member of the BAH2 acyltransferase family                               | Cytoplasm <sup>2</sup>                           | 8    | 2   | 1    |                          |  |
| AT4G15410 | PUX5       | Serine/threonine protein phosphatase 2A 55 kDa regulatory subunit B prime gamma         | Nucleus <sup>2</sup>                             | 3    | 1   | 0    | SALK_115978C             |  |
| AT4G15415 | ATB' GAMMA | B' regulatory subunit of protein phosphatase 2A                                         | Chloroplast <sup>1</sup> /Nucleus <sup>2</sup>   | 1    | 1   | 1    | SALK_039172C             |  |
| AT4G15417 | RTL1       | RNAse II-like 1                                                                         | Cytoplasm <sup>2</sup>                           | 2    | 1   | 1    |                          |  |
| AT4G15420 |            | Ubiquitin fusion degradation UFD1 family protein                                        | Nucleus <sup>2</sup>                             | 1    | 1   | 1    | SALK_063032C             |  |
| AT4G15430 |            | ERD (early-responsive to dehydration stress) family protein                             | Secreted <sup>1</sup> /Membrane <sup>2</sup>     | 18   | 7   | 4**  | SALK_058350, SALK_015653 |  |
| AT4G15440 | HPL1       | Encodes a hydroperoxide lyase. A member of the CYP74B cytochrome p450 family            | Chloroplast <sup>2</sup>                         | *    | -   | -    |                          |  |
| AT4G15450 |            | Senescence/dehydration-associated protein-related                                       | Mitochondrion <sup>1</sup>                       | 3    | 2   | 0    |                          |  |
| AT4G15460 |            | Glycine-rich protein                                                                    | Secreted <sup>1</sup> /Membrane <sup>2</sup>     | 1    | 0   | 0    |                          |  |
| AT4G15470 |            | Bax inhibitor-1 family protein                                                          | Unknown <sup>1</sup>                             | 2    | 1   | 0    | SAIL_151_F11             |  |
| AT4G15475 |            | F-box/RNI-like superfamily protein                                                      | Nucleus                                          | 26   | 5   | 4    | SALK_041396C             |  |
| AT4G15480 | UGT84A1    | Encodes a protein that might have sinapic acid:UDP-glucose glucosyltransferase activity | Unknown <sup>1</sup>                             | 44   | 13  | 8    | SALK_129336C             |  |
| AT4G15490 | UGT84A3    | Encodes a protein that might have sinapic acid:UDP-glucose glucosyltransferase activity | Unknown <sup>1</sup>                             | 7    | 5   | 2    | SAIL_75_C11, SALK_045492 |  |
| AT4G15500 | UGT84A4    | Encodes a protein that might have sinapic acid:UDP-glucose glucosyltransferase activity | Unknown <sup>1</sup>                             | 1    | 0   | 0    |                          |  |
| AT4G15510 | PPD1       | A nuclear-encoded thylakoid luminal protein that is associated with photosystem I (PSI) | Chloroplast <sup>1,2</sup>                       | 0    | 0   | 0    |                          |  |
| AT4G15520 |            | tRNA/rRNA methyltransferase (SpoU) family protein                                       | Cytoplasm <sup>2</sup>                           | 0    | 0   | 0    |                          |  |
| AT4G15530 | PPDK       | Encodes a dual-targeted protein believed to act as a pyruvate, orthophosphate dikinase  | Chloroplast <sup>2</sup>                         | 2    | 1   | 0    | SALK_023320              |  |
| AT4G15540 | UMAMIT38   | Nodulin MtN21-like transporter family protein                                           | Membrane <sup>2</sup>                            | 3    | 2   | 1    | SALK_050293C             |  |
| AT4G15545 |            |                                                                                         | Unknown <sup>1</sup>                             | 1    | 0   | 0    |                          |  |
| AT4G15550 | IAGLU      | UDP-glucose:indole-3-acetate beta-D-glucosyltransferase                                 | Chloroplast <sup>1</sup> /Cytoplasm <sup>2</sup> | 1    | 1   | 1    |                          |  |
| GOT6      |            |                                                                                         |                                                  |      |     |      |                          |  |

B

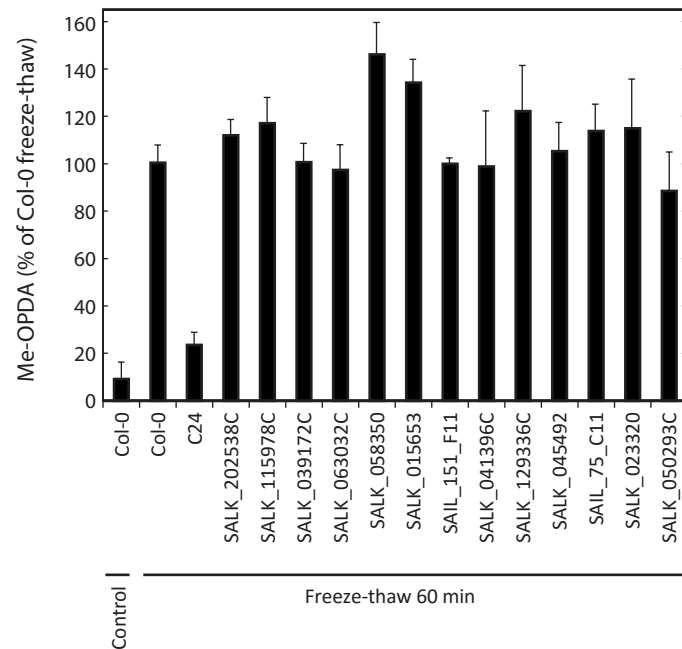

**Fig. S2. Fine mapping of the QTL determining arabidopside accumulation.** **A**, The QTL accountable for the difference in arabidopside accumulation between Col-0 and C24 could be isolated to a 64 kpb region on chromosome four flanked by the genetic markers GOT35 and GOT6. SNPs, number of single nucleotide polymorphisms; NSS, number of non-synonymous amino acids substitutions; NSSP, number of non-synonymous amino acids substitutions with altered chemical properties. Sub-cellular localization of gene products was retrieved from 1 TAIR (Lamesch et al. 2012) or predicted by 2 TargetP (Emanuelsson et al. 2000). \* denotes a frameshift mutation in Col-0 and \*\* a premature stop codon in C24. **B**, A total lipid extract derived from leaf discs from Col-0, C24, or homozygous T-DNA mutant plants in Col-0 genetic background were transmethylated and analyzed for glycerolipid bound OPDA by GC-MS. Data was normalized to the level of Me-OPDA in Col-0 after 60 minutes of freeze-thaw treatment. Error bars represent standard deviation where n=3-6.



**Table S2. Primers used for real time quantitative PCR.** The symbol ~ denotes intron gap.

| <b>Gene</b> | <b>Locus</b> | <b>Left primer</b>           | <b>Right Primer</b>       |
|-------------|--------------|------------------------------|---------------------------|
| <i>HPL1</i> | At4G15440    | GCACGCCAAG~ATAAAAGGT         | AAGATGCAACGTTGGAGAGG      |
| <i>HPL1</i> | At4G15440    | GGCCTAGCCTTGGGTTCTAC         | AAGATGCAACGTTGGAGAGG      |
| <i>ACT8</i> | At1G49240    | GCTGGATTCGCTGGAGATGA         | AGGTCTCCATCTCTTGCTCG      |
| <i>UBQE</i> | At5G25760    | CAGTCTGTGTGTAGAGCTATCATAGCAT | AGAAGATTCC~CTGAGTCGCAGTT  |
| <i>LOX2</i> | At3G45140    | CTATGGAATCTTGCTAAGACTCATG    | CGGCTGAACTTAGCTCTAATGCATA |
| <i>AOS</i>  | At5G42650    | CTTACCGGCGCATTGTTTAT         | AAGTCAAAGCCGGTCAAATG      |
| <i>AOC1</i> | At3G25760    | AATACCGAAAACCCAGACC          | TTCGATCACAACGCAGAGAC      |
| <i>AOC2</i> | At3G25770    | GCCAAGAAGAACCTCACTGC         | TCCGAGACCGAACATTAAGC      |
| <i>AOC3</i> | At3G25780    | GACCGAAAACCCAGACCAA          | TTCAGGAACGTGTTGGATCA      |
| <i>AOC4</i> | At1G13280    | TTCAGAACCATTTCAGCAG          | CGGTGATTCCATGCGTTTT       |

**Table S3. PCR markers used for mapping.** SSLP, Simple Sequence Length Polymorphisms; SNP, Single-Nucleotide Polymorphism; TP-ARMS, Tetra-Primer Amplification Refractory Mutation System (Ye, Dhillon et al. 2001).

| Marker name   | Chromosome | Nearest locus | Genomic position | Marker type | Left primer(s)                                     | Right primer(s)              | PCR product length (bp) |
|---------------|------------|---------------|------------------|-------------|----------------------------------------------------|------------------------------|-------------------------|
| <b>MN1.5</b>  | 1          | AT1G03620     | 898430           | SSLP        | TTATTATCAAGATCAAAGATTGTATGGTTT                     | CTTGTTTTATATCTGTTGGTTTAATTGT | Col 308; C24 320        |
| <b>CIW12</b>  | 1          | AT1G27660     | 9621344          | SSLP        | AGGTTTTATTGCTTTTCACA                               | CTTCAAAGCACATCACA            | Col 128; C24 100        |
| <b>NGA280</b> | 1          | AT1G55840     | 20873698         | SSLP        | GGCTCCATAAAAAGTGCACC                               | CTGATCTCACGGACAATAGTGC       | Col 105; C24 85         |
| <b>ATPASE</b> | 1          | AT1G76030     | 28533837         | SSLP        | GTTACAGAGAGACTCATAAACCA                            | CTGGGAACGGTTCGATTCGAGC       | Col 85; C24 69          |
| <b>NGA692</b> | 1          | AT1G76820     | 28836552         | SSLP        | AGCGTTTAGCTCAACCTTAGG                              | TTTAGAGAGAGAGAGCGCGG         | Col 110; C24 90         |
| <b>GOT10</b>  | 2          | AT2G02540     | 693817           | SSLP        | GCGGTGAGTATCTCATTGCAT                              | AAGCCATTCCCTAAACCAC          | Col 214; C24 165        |
| <b>GOT42</b>  | 2          | AT2G21620     | 9249365          | SSLP        | ATTCATTTGTCGCATTTGCT                               | CAACAACACGAGCCACACTC         | Col 207; C24 188        |
| <b>GOT11</b>  | 2          | AT2G41905     | 17493070         | SSLP        | GGTTTCCATGTTGGCTCAGT                               | GAACCAACGATTGGGCTAGA         | Col 126; C24 147        |
| <b>NGA172</b> | 3          | AT3G03340     | 786296           | SSLP        | CATCCGAATGCCATTGTTT                                | AGCTGCTTCCTTATAGCGTCC        | Col 162; C24 150        |
| <b>CIW11</b>  | 3          | AT3G26610     | 9775545          | SSLP        | CCCCGAGTTGAGGTATT                                  | GAAGAAATTCCTAAAGCATT         | Col 180; C24 230        |
| <b>GOT47</b>  | 3          | AT3G44735     | 16292750         | SSLP        | AACATGTTTTTGATAATCATCCATC                          | CATCTAAAAGATCTCCAGATTAAGTGA  | Col 218; C24 250        |
| <b>GOT48</b>  | 3          | AT3G44755     | 16301990         | SSLP        | TCTCTTGATGGTGGTGTTC                                | AGCCAGACCAGAACTACG           | Col 177; C24 189        |
| <b>GOT39</b>  | 3          | AT3G61550     | 22776727         | SSLP        | TCGTGCTGGAGGTCTTGAT                                | ACGGGACAAGAACCATTGAG         | Col 244; C24 229        |
| <b>GOT45</b>  | 4          | AT4G00880     | 367804           | SSLP        | ATCGAAAAACGAATCCATGC                               | AATATCCCCACTTAGATATTCCA      | Col 139; C24 154        |
| <b>GOT46</b>  | 4          | AT4G00890     | 372994           | SSLP        | GCCTCTGTTATTTAGGCTGAAAAT                           | CAGCTGTTGGTCAAAGTATACA       | Col 224; C24 267        |
| <b>MN4.2</b>  | 4          | AT4G07410     | 4197601          | SSLP        | TAAGGTCAGACTATATGTTTACGTTTCATT                     | GTCATCCTCGTTAAAGTTACGATTG    | Col 347; C24 357        |
| <b>GOT3</b>   | 4          | AT4G07840     | 4644916          | SSLP        | TCCTTAAAGCCCTTTGTTTATG                             | TTGTTGCTTTATTGGTTGGTTT       | Col 175; C24 154        |
| <b>GOT4</b>   | 4          | AT4G09720     | 6131588          | SSLP        | GTGGATGCTAAGCGAATGGT                               | ATCGGGGAAGGGTGATGTAT         | Col 209; C24 177        |
| <b>GOT23</b>  | 4          | At4G11750     | 7077901          | SNP         | CCATGTTTGGGTTTTGAGATC;<br>CCCATGTTAAGGTTTTGAGATT   | TATTCACCAACGGTGCCTTC         | Col, C24 206            |
| <b>CIW6</b>   | 4          | AT4G13575     | 7892624          | SSLP        | CTCGTAGTGCACCTTCATCA                               | CACATGGTTAGGGAAACAATA        | Col 162; C24 155        |
| <b>GOT22</b>  | 4          | AT4G14400     | 8297901          | SNP         | GGTTATATCAGCGATGCCAAC;<br>GGTTATATCAGCGATAGCAAA    | GCAAGGCCACATGTAAGGAT         | Col, C24 187            |
| <b>GOT31</b>  | 4          | AT4G14590     | 8375401          | SNP         | ATCGAGCGAAGCGTTATGC;<br>CACATCGAACGAAGTGTAAGC      | TTCACATGAACCGTCTTCTCC        | Col, C24 256            |
| <b>GOT25</b>  | 4          | AT4G14760     | 8484735          | SNP         | GAGTATTCAGGGACCAATAG;<br>GAGTATTCAGGGACCAATAT      | TCTCCAAAAGAGCGCATTGT         | Col, C24 243            |
| <b>GOT33</b>  | 4          | AT4G14965     | 8553090          | SNP         | TGAAGGTGGAGAGGTAGAACTC;<br>TGAAGGTGGAGAGGTATGAACTT | CTTGCCAAGAGGTTACAGT          | Col; C24: 268           |
| <b>GOT29</b>  | 4          | AT4G15100     | 8625334          | SNP         | CGAACATATCTATCCGAGACTTG;<br>CGAGCATATCTATCTGAACTCG | GGTGGTGAATGATTCCAGA          | Col, C24 322            |
| <b>GOT32</b>  | 4          | AT4G15290     | 8721450          | SSLP        | TGACAAAGGAAATATAGCATGTACG                          | AAGGGTTTGTGAGCATGG           | Col 336; C24 302        |
| <b>GOT35</b>  | 4          | AT4G15396     | 8809580          | SSLP        | CCCAGATGGTGAGTATCCAA                               | TGTGATCCTAAGCGACTCATTT       | Col 260; C24 278        |
| <b>GOT30</b>  | 4          | AT4G15440     | 8837250          | SSLP        | AAAATACAGAAGAACTGTATACAAAA                         | GATTCGATTGTCCCCAGAA          | Col 282; C24 315        |

|                  |   |           |          |             |                                                               |                                                            |                          |
|------------------|---|-----------|----------|-------------|---------------------------------------------------------------|------------------------------------------------------------|--------------------------|
| <b>GOT37</b>     | 4 | AT4G15490 | 8852180  | SSLP        | ACGGTGTGTGCAATAACCAA                                          | CCTCAGGCATCATCTCTCGT                                       | Col 432; C24 369         |
| <b>GOT6</b>      | 4 | AT4G15545 | 8876513  | SSLP        | GCTGCAACTGACAACGAAAA                                          | GCCGTGGCGTAGTAGTTTGT                                       | Col 167; C24 179         |
| <b>GOT27</b>     | 4 | AT4G15890 | 9018101  | SNP         | TGGGAAGATTCTGGGAGGAG;<br>GTGGGAAGATTTTAGGTGGAG                | AAACTCTGATTGGCCCTCAA                                       | Col, C24 310             |
| <b>GOT9</b>      | 4 | AT4G16444 | 9276263  | SNP         | TAAAGAAACGGCCATTAA;<br>TGGGCTTCGTTGAAATTCTT                   | TCCTATTCATTCTAAATTTGGATACTT                                | Col 157; C24 173         |
| <b>GOT17</b>     | 4 | AT4G16770 | 9434101  | SNP         | GGTGGAAACCTGAGGCAGG;<br>GGTGGAAACCTGAGGCAGC                   | CAGACCCAAACTGCGTTGTA                                       | Col, C24 226             |
| <b>GOT15</b>     | 4 | AT4G17030 | 9584800  | TP-<br>ARMS | GAAGAAAATGTGAGTTTCTTCTTCTTCT;<br>CGAAAGACATAGTTTGTAGAATCGAAGC | CGTGAGTTTCTTCATACCCAAAGAAG;<br>TTCTTTGGGAAGACTCTAAGAGAATGC | Col 104+166; C24 117+166 |
| <b>GOT18</b>     | 4 | AT4G17140 | 9630919  | SNP         | GCTGCTCTTCTCGAGTCCA;<br>GCTGCTCTTCTCGAGTCCG                   | GCGGCGGTATTTATGCTTAG                                       | Col, C24 180             |
| <b>GOT19</b>     | 4 | AT4g17565 | 9782371  | SNP         | TGGTCGATGAATCCCTTATG                                          | CATGACTTCAAGGTGTTATG;<br>CATGACTTCAAGGTGTTATA              | Col, C24 165             |
| <b>GOT13</b>     | 4 | AT4G18425 | 10180210 | SNP         | CTGGAGTCAAGTCCCAGTTC                                          | ATAATTGCAACAACCTAAAAAGA;<br>ATAATTGCAACAACCTAAAACAA        | Col, C24 159             |
| <b>GOT16</b>     | 4 | AT4G19185 | 10482401 | TP-<br>ARMS | GGTTATGCCTAACGTGTTTTCCGGAGTC;<br>TACATCCGTAACGGTCCAAATCCACAGT | TACCGGTGTAACGGCGTCAAGTAGCTC;<br>CTGATTTACCTACGCCGTCGATTAAC | Col 199+365; C24 220+365 |
| <b>GOT7</b>      | 4 | AT4G20330 | 10977375 | SSLP        | TCTTGAGCAAGGTGCAAAAA                                          | TAACTTCCAGGCGGCCTTAT                                       | Col 144; C24 135         |
| <b>GOT8</b>      | 4 | AT4G33970 | 16272270 | SSLP        | TCGAGAGAGGTGAGAAGGTCA                                         | CACATCTCTCATTGGATGATGAA                                    | Col 138; C24 150         |
| <b>T22D6-1ME</b> | 5 | AT5G08090 | 2584790  | SSLP        | ACGCTTCCAAAAATCCACAA                                          | CTCGGGAGACTCGCACGAT                                        | Col 175; C24 230         |
| <b>NGA139</b>    | 5 | AT5G24620 | 8428133  | SSLP        | GGTTTCGTTTCACTATCCAGG                                         | AGAGCTACCAGATCCGATGG                                       | Col 174; C24 132         |
| <b>GOT44</b>     | 5 | AT5G24680 | 8453593  | SSLP        | TCACGCTTCTCTCTCCCTA                                           | GGTGATCGGTTTCGATTGT                                        | Col 197; C24 181         |
| <b>GOT38</b>     | 5 | AT5G38840 | 15551620 | SSLP        | CTCCGTGTACCAATTTTCAG                                          | TGAAACCGAGAAATCGAAGG                                       | Col 245; C24 230         |
| <b>CER456385</b> | 5 | AT5G59160 | 23882280 | SSLP        | CACCGCCACCATACGAGCAT                                          | TTCTGGCGGAGGATACTTCTTGAA                                   | Col 210; C24 160         |

Ye, S., S. Dhillon, et al. (2001). "An efficient procedure for genotyping single nucleotide polymorphisms." *Nucleic Acids Research* **29**(17): e88.

Duan, H., M. Y. Huang, K. Palacio and M. A. Schuler (2005). "Variations in CYP74B2 (hydroperoxide lyase) gene expression differentially affect hexenal signaling in the Columbia and Landsberg erecta ecotypes of Arabidopsis." *Plant Physiology* **139**(3): 1529-1544.

Emanuelsson, O., H. Nielsen, S. Brunak and G. von Heijne (2000). "Predicting subcellular localization of proteins based on their N-terminal amino acid sequence." *Journal of Molecular Biology* **300**(4): 1005-1016.

Lamesch, P., T. Z. Berardini, D. Li, D. Swarbreck, C. Wilks, R. Sasidharan, R. Muller, K. Dreher, D. L. Alexander, M. Garcia-Hernandez, A. S. Karthikeyan, C. H. Lee, W. D. Nelson, L. Ploetz, S. Singh, A. Wensel and E. Huala (2012). "The Arabidopsis Information Resource (TAIR): improved gene annotation and new tools." *Nucleic Acids Research* **40**(Database issue): D1202-1210.
